# Supplementary material for: Expanding the GEFS+ Spectrum: Functional Characterization Of A SCN1B Variant
Source: Research Square preprint supplement (doi:10.21203/rs.3.rs-7958282/v1), 2025-12-01
Supplement: Supplementary file 1 [file 40b7f5ec07159cd34bfc4661.docx]

**Supplementary results**

**Supplementary Table 1.** Effects of hβ1 subunit variant p.Leu13Pro on human NaV channel isoforms. All values are indicated with standard error of the mean (SEM). Statistical results of the Student’s t-test are indicated with p-value <0.05 (*), <0.01 (**) and <0.001 (#). All analyses were carried out using Prism 8 (GraphPad, USA).

|  | hNaV1.1 | | hNaV1.2 | | hNaV1.6 | |
| --- | --- | --- | --- | --- | --- | --- |
| hβ1WT | hβ1L13P | hβ1WT | hβ1L13P | hβ1WT | hβ1L13P |
| Activation (V1/2; mV) | -23.25 ± 0.53 | -17.48 ± 0.24# | -32.91 ± 2.32 | -21.66 ± 0.35# | -23.24 ± 0.80 | -20.82 ± 1.05 |
| Inactivation (V1/2; mV) | -41.45 ± 0.29 | -27.15 ± 0.64# | -47.55 ± 0.24 | -37.59 ± 0.75* | -53.33 ± 0.44 | -42.74 ± 0.59# |
| Recovery (T1/2; ms) | 2.93 ± 0.14 | 3.21 ± 0.35* | 4.39 ± 0.10 | 4.86 ± 0.17* | 4.39 ± 0.23 | 5.90 ± 0.15# |
| Activation CHO (V1/2; mV) |  |  | -12.18 ± 1.81 | -6.08 ± 1.16* |  |  |
| Inactivation CHO (V1/2; mV) |  |  | -46.92 ± 1.29 | -38.95 ± 2.03** |  |  |

**Supplementary methods**

Nav channel and β-subunit constructs

Human (h) hNaV1.1 (NM_001165963.1), hNaV1.2 (NM_021007.2) and hNaV1.6 (NM_014191.3) clones were obtained from OriGene Technologies, Inc. (USA) and hβ1 (NM_001037.5) was obtained from GenScript (USA). hβ1-subunit variant p.Leu13Pro, referred to as hβ1L13P, was synthesized using the QuikChange II Site-Directed Mutagenesis Kit (Agilent Technologies, USA). To check for undesired rearrangement events, the DNA sequence of all constructs was confirmed by automated Sanger sequencing. cRNA was synthesized using the T7 mMESSAGE-mMACHINETM kit (ThermoFisher Scientific, USA) after linearizing the DNA with the appropriate restriction enzyme.

Two-Electrode Voltage-Clamp in *Xenopus laevis* oocytes
hNaV channel constructs were expressed in *Xenopus laevis* oocytes together with the hβ1-subunit (1:5 molar ratio) by microinjecting cRNA into defolliculated oocytes and electrophysiological recordings were taken 1−3 days post cRNA injection. Oocytes were maintained at 17°C in Barth’s medium (88 mM NaCl, 1 mM KCl, 5 mM HEPES, 2.4 mM NaHCO3, 0.41 mM CaCl2, 0.82 mM MgSO4, 0.33 mM Ca(NO3)2, and 50 μg/mL gentamycin (pH 7.4) with NaOH). Channel kinetics were studied using the two-electrode voltage-clamp recording technique (OC-725C, Warner Instruments, USA) with a 150 µl recording chamber. Data were filtered at 4 kHz and digitized at 20 kHz using pClamp10 software (Molecular Devices, USA). Microelectrode resistances were 0.5−1 MΩ filled with 3M KCl. The external recording solution ND100 contained 100 mM NaCl, 5 mM HEPES, 1 mM MgCl2, and 1.8 mM CaCl2 (pH 7.6) with NaOH. All experiments were performed at room temperature (∼21°C). Leak and background conductances, identified by blocking NaV channels with tetrodotoxin (TTX), were subtracted for all NaV channel-mediated currents.

Cell culture and transfectionChinese Hamster Ovarian K1 (CHO-K1) cells were cultured in Ham’s F-12 medium (GibcoTM, USA), supplemented with 10% FBS (GibcoTM, USA) and 1% Penicillin-Streptomycin (GibcoTM, USA). Cells were maintained in an incubator at 37°C and 5% CO2. Cells were split using Trypsin (GibcoTM, USA) and used at confluence of approximately 70% for transfection with LipofectamineTM 2000 Transfection Reagent (InvitrogenTM, USA), according to manufacturer’s protocol. Cells were transfected with 1.5µg hNaV1.2 DNA construct together with 1.5 µg of hβ1WT or hβ1L13P construct. Plasmid containing mCherry was co-transfected to allow identification of successful transfected cells. Whole-cell patch clamp experiments were performed at approximately 48 hours post transfection.

Whole-cell patch clamp in CHO-K1 cellsFire-polished pipettes were pulled from borosilicate glass (A-M Instruments, USA) to a resistance of approximately 3.5MΩ using a P-1000 puller (Sutter instruments, USA). Whole-cell voltage-clamp recordings were acquired at room temperature using a MultiClamp 700B amplifier and pClamp 10 software (Molecular Devices, USA). All recorded currents were filtered at 10kHz and sampled at 20kHz. Leak was subtracted using a -P/4 protocol. Extracellular solution contained (in mM) 130 NaCl, 4 KCl, 1.5 CaCl2, 1 MgCl2, 10 HEPES, pH 7.4 with NaOH, 300 mOsm. Intracellular solution (IC) contained (in mM) 120 CsF, 15 NaCl, 10 EGTA, 10 HEPES, pH 7.25 with CsOH, 280 mOsm. Liquid junction potential was calculated using an online calculator as ~10 mV and were not corrected.

Analysis of channel activityVoltage−activation relationships were obtained by measuring peak currents and calculating conductance (G), and a Boltzmann function was fit to the data according to the equation *G/G*max = [1 + e*−zF(V−V1/2)/RT*]−1 , where *G/ G*max is the normalized conductance, z is the equivalent charge, V1/2 is the half-activation voltage, F is Faraday’s constant, R is the gas constant, and T is the temperature in kelvin. The fast inactivation time constants (ͳ) were fit using a single exponential fit. Off-line data analysis was performed using Clampfit10 (Molecular Devices, USA), Excel (Microsoft Office, USA) and Prism 8 (GraphPad, USA).

Statistical analysisSignificance of all normalized conductance-voltage (G-V) and channel availability (I-V) relationships was analyzed using two-way analysis of variance (ANOVA) with post-hoc Bonferroni correction. Individual time point values for fast inactivation time constants (τ) were analyzed using two-way Student’s *t*-test. For data presented in Supplementary Table S1, Student’s *t*-test (unpaired) against hβ1-subunit was used. Values in all cases reflect the mean and error bars reflect standard error of the mean (S.E.M.); p<0.05 (*), 0.01 (**) or 0.001 (#). All statistical analysis was carried out using Prism 8 (GraphPad, USA).

Qualitative biochemical assessment of hβ1 expression in *Xenopus* oocytes Oocytes expressing wild-type hβ1 or hβ1L13P were washed twice with ND100 and incubated with 1 mg/ml Sulfo-NHS-LC-biotin (Pierce, USA) overnight. Oocytes were washed and lysed in 20 μl/oocyte buffer H (1% Triton X-100, 100 mM NaCl, 20 mM Tris-HCl, pH 7.4) plus protease inhibitor cocktail (Sigma-Aldrich, USA) and shaken for 60 min at 4°C after which they were centrifuged at 16,200xg for 3 min. 200 μl of hydrophilic streptavidin magnetic beads (New England Biolabs, USA) were added and the sample shaken gently at 10 rpm at 4°C overnight. Beads were washed 2 times with buffer H and resuspended in 40 μl buffer H, after which the biotinylated protein was dissociated through the addition of 1X loading buffer plus reducing agent (10% 2-ME, 50 mM DTT final concentration) and boiled at 95°C for 5 min to generate the surface protein fraction. 35µl of all samples were loaded on a Novex™ WedgeWell™ 10% Tris-Glycine Mini-Gel (Thermo Fisher Scientific, USA) with Tris-Glycine running buffer and analyzed by Western analysis. Nitrocellulose membranes were probed overnight at 4°C with 1:1000 mouse anti-MYC tag polyclonal primary antibody (Cell Signaling Technologies, USA) and for 60 min at room temperature with 1:5000 goat anti-mouse IgG HRP-conjugated antibody as secondary (Abcam, United Kingdom). Membranes were incubated for 5 min with Clarity Max Western ECL Substrate (Bio-Rad Laboratories, USA) before imaging.
